# Supplementary material
Source: MDPI journal article supplement (https://www.mdpi.com/2071-1050/13/24/13799)
Supplement: s1 [file s1]

## Supplementary Materials S1. Photographs used

|                                                                                     |                                                                                      |
|-------------------------------------------------------------------------------------|--------------------------------------------------------------------------------------|
|    |    |
| PHOTO 1                                                                             | PHOTO 2                                                                              |
|   |   |
| PHOTO 3                                                                             | PHOTO 4                                                                              |
|  |  |
| PHOTO 5                                                                             | PHOTO 6                                                                              |
|  |  |
| PHOTO 7                                                                             | PHOTO 8                                                                              |



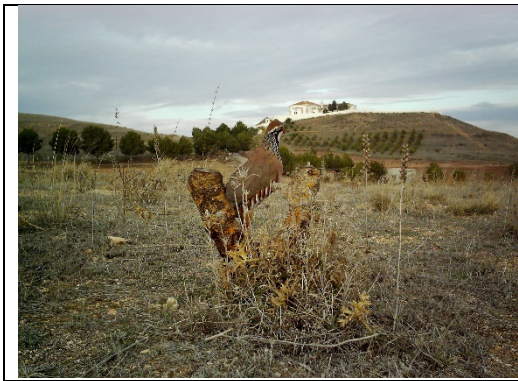

PHOTO 9

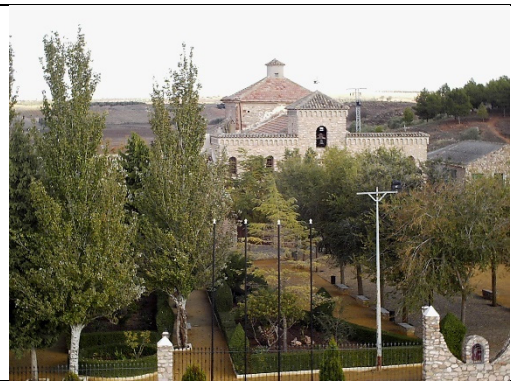

PHOTO 10

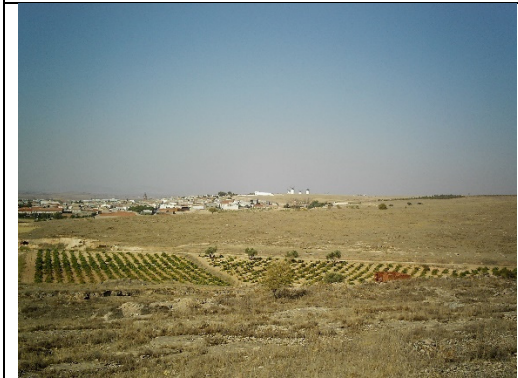

PHOTO 11

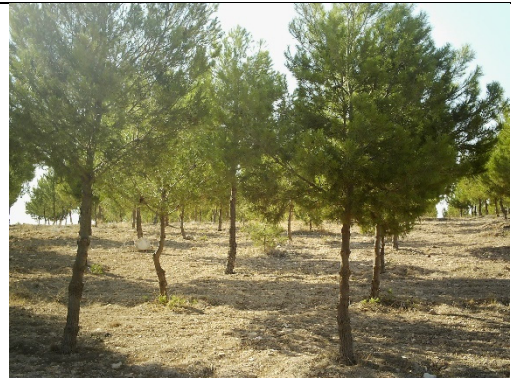

PHOTO 12

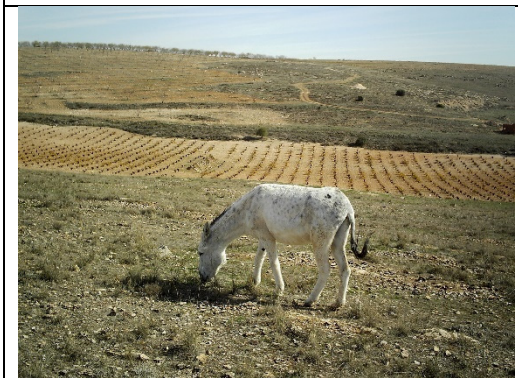

PHOTO 13

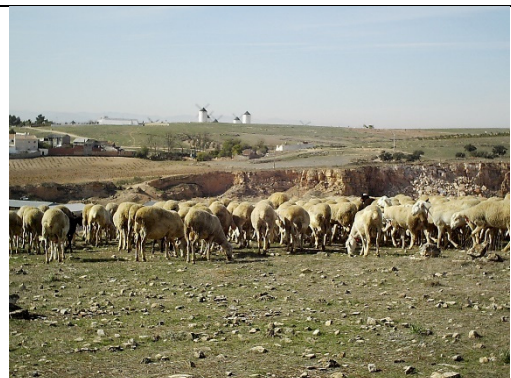

PHOTO 14

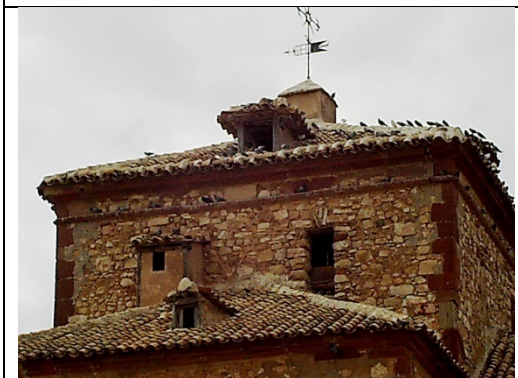

PHOTO 15

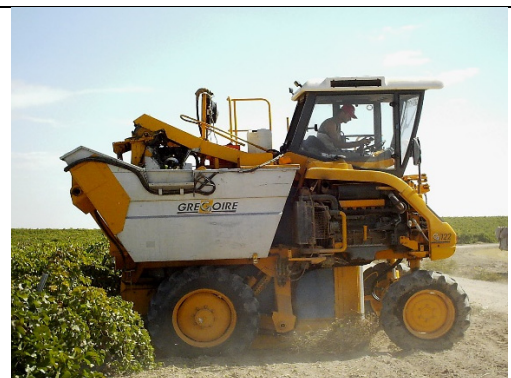

PHOTO 16
